# Supplementary material for: Co-Expression of IL-7 Improves NKG2D-Based CAR T Cell Therapy on Prostate Cancer by Enhancing the Expansion and Inhibiting the Apoptosis and Exhaustion
Source: PubMed Central journal article supplement (PMC7409228; doi:10.3390/cancers12071969), 2020-07-20

Supplementary Materials:

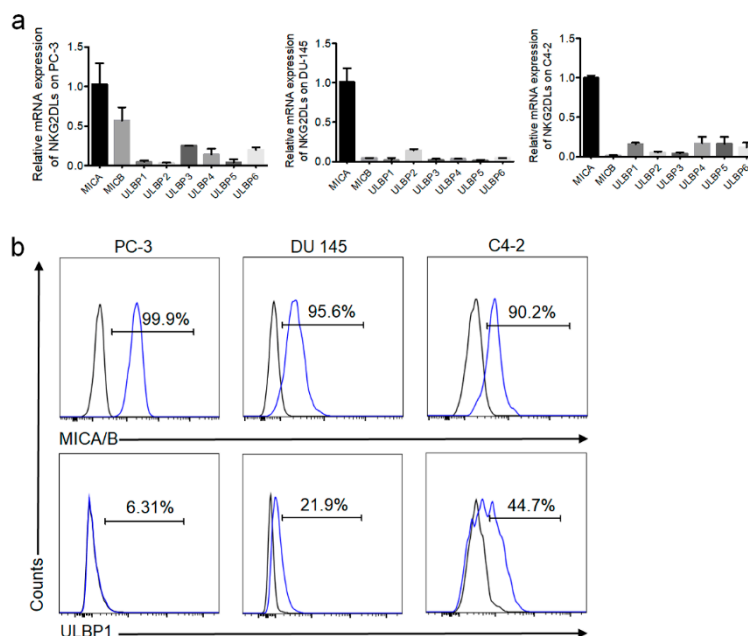

**Figure S1.** Expression level of NKG2D ligands. Q-PCR (a) and flow cytometry analysis (b) of the expression of NKG2D ligands on prostate cancer cell lines of PC-3, DU 145 and C4-2. The same cells stained with isotype antibody were used for gating (black). Data shown are representatives of experiments with similar results.

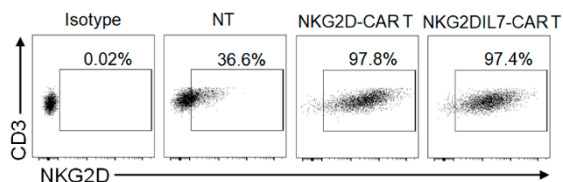

**Figure S2.** Expression level of NKG2D CAR. Human T cells were transduced with lentiviruses expressing NKG2D-CAR or NKG2DIL7-CAR and the representative flow cytometry plot was indicated. Gating was based on the same cells stained with isotype-matched antibody. Data shown are representatives of experiments with similar results.

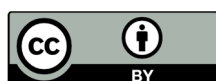

Supplement: cancers-12-01969-s001.pdf [file cancers-12-01969-s001.pdf]
